# Supplementary material for: A phase 3 randomized, double-blind, placebo-controlled study to evaluate the efficacy and safety of sarilumab in patients with giant cell arteritis
Source: Arthritis Res Ther. 2023 Oct 16;25:199. doi: 10.1186/s13075-023-03177-6 (PMC10577982; doi:10.1186/s13075-023-03177-6)
Supplement: Supplementary file 3 — Additional file 3: Table S3. Standardized 52-week GC-taper regimen during the study treatment period. [file 13075_2023_3177_MOESM3_ESM.docx]

**Additional file 3**

**Table S3** Standardized 52-week GC-taper regimen during the study treatment period

| **Week** | **Daily PS dose 52-week taper regimen (mg/day)** | | | | | | |
| --- | --- | --- | --- | --- | --- | --- | --- |
| 0 (Day 1)  *PS starting dose* | 60a | 50a | 40a | 35a | 30a | 25a | 20a |
| 1 | 50 a | 40a | 35a | 30a | 25a | 20a | 17 |
| 2 | 40a | 35a | 30a | 25a | 20a | 17 | 17 |
| 3 | 35a | 30a | 25a | 20a | 17 | 17 | 15 |
| 4 | 30a | 25a | 20a | 17 | 17 | 15 | 15 |
| 5 | 25a | 20a | 17 | 17 | 15 | 15 | 12 |
| 6 | 20a | 17 | 17 | 15 | 15 | 12 | 10 |
| 7 | 17 | 17 | 15 | 15 | 12 | 10 | 10 |
| 8 | 17 | 15 | 15 | 12 | 10 | 10 | 10 |
| 9 | 15 | 15 | 12 | 10 | 10 | 10 | 10 |
| 10 | 15 | 12 | 10 | 10 | 10 | 10 | 9 |
| 11 | 12 | 10 | 10 | 10 | 10 | 9 | 9 |
| 12 | 10 | 10 | 10 | 10 | 9 | 9 | 9 |
| 13 | 10 | 10 | 10 | 9 | 9 | 9 | 9 |
| 14 | 10 | 10 | 9 | 9 | 9 | 9 | 8 |
| 15 | 10 | 9 | 9 | 9 | 9 | 8 | 8 |
| 16 | 9 | 9 | 9 | 9 | 8 | 8 | 8 |
| 17 | 9 | 9 | 9 | 8 | 8 | 8 | 8 |
| 18 | 9 | 9 | 8 | 8 | 8 | 8 | 7 |
| 19 | 9 | 8 | 8 | 8 | 8 | 7 | 7 |
| 20 | 8 | 8 | 8 | 8 | 7 | 7 | 7 |
| 21 | 8 | 8 | 8 | 7 | 7 | 7 | 7 |
| 22 | 8 | 8 | 7 | 7 | 7 | 7 | 6 |
| 23 | 8 | 7 | 7 | 7 | 7 | 6 | 6 |
| 24 | 7 | 7 | 7 | 7 | 6 | 6 | 6 |
| 25 | 7 | 7 | 7 | 6 | 6 | 6 | 6 |
| 26 | 7 | 7 | 6 | 6 | 6 | 6 | 5 |
| 27 | 7 | 6 | 6 | 6 | 6 | 5 | 5 |
| 28 | 6 | 6 | 6 | 6 | 5 | 5 | 5 |
| 29 | 6 | 6 | 6 | 5 | 5 | 5 | 5 |
| 30 | 6 | 6 | 5 | 5 | 5 | 5 | 4 |
| 31 | 6 | 5 | 5 | 5 | 5 | 4 | 4 |
| 32 | 5 | 5 | 5 | 5 | 4 | 4 | 4 |
| 33 | 5 | 5 | 5 | 4 | 4 | 4 | 4 |
| 34 | 5 | 5 | 4 | 4 | 4 | 4 | 3 |
| 35 | 5 | 4 | 4 | 4 | 4 | 3 | 3 |
| 36 | 4 | 4 | 4 | 4 | 3 | 3 | 3 |
| 37 | 4 | 4 | 4 | 3 | 3 | 3 | 3 |
| 38 | 4 | 4 | 3 | 3 | 3 | 3 | 2 |
| 39 | 4 | 3 | 3 | 3 | 3 | 2 | 2 |
| 40 | 3 | 3 | 3 | 3 | 2 | 2 | 2 |
| 41 | 3 | 3 | 3 | 2 | 2 | 2 | 2 |
| 42 | 3 | 3 | 2 | 2 | 2 | 2 | 1 |
| 43 | 3 | 2 | 2 | 2 | 2 | 1 | 1 |
| 44 | 2 | 2 | 2 | 2 | 1 | 1 | 1 |
| 45 | 2 | 2 | 2 | 1 | 1 | 1 | 1 |
| 46 | 2 | 2 | 1 | 1 | 1 | 1 | No PS dosing |
| 47 | 2 | 1 | 1 | 1 | 1 | No PS dosing | No PS dosing |
| 48 | 1 | 1 | 1 | 1 | No PS dosing | No PS dosing | No PS dosing |
| 49 | 1 | 1 | 1 | No PS dosing | No PS dosing | No PS dosing | No PS dosing |
| 50 | 1 | 1 | No PS dosing | No PS dosing | No PS dosing | No PS dosing | No PS dosing |
| 51 | 1 | No PS dosing | No PS dosing | No PS dosing | No PS dosing | No PS dosing | No PS dosing |
| aPS was provided as open-label.  GC, glucocorticoid; PBO, placebo; PS, prednisone | | | | | | | |
